# Supplementary material for: Entropic Inhibition: How the Activity of a AAA+ Machine Is Modulated by Its Substrate-Binding Domain
Source: PubMed Central journal article supplement (PMC8056383; doi:10.1021/acschembio.1c00156), 2021-03-19
Supplement: cb1c00156_si_001.pdf [file cb1c00156_si_001.pdf]

## **Supplementary Information for**

“Entropic inhibition: how the activity of a AAA+ machine is modulated by its substrate-binding domain”

Marija Iljina <sup>\*</sup>, Hisham Mazal, Pierre Goloubinoff, Inbal Riven and Gilad Haran <sup>\*</sup>

<sup>\*</sup> Correspondence to: [Marija.Iljina@weizmann.ac.il](mailto:Marija.Iljina@weizmann.ac.il), [Gilad.Haran@weizmann.ac.il](mailto:Gilad.Haran@weizmann.ac.il)

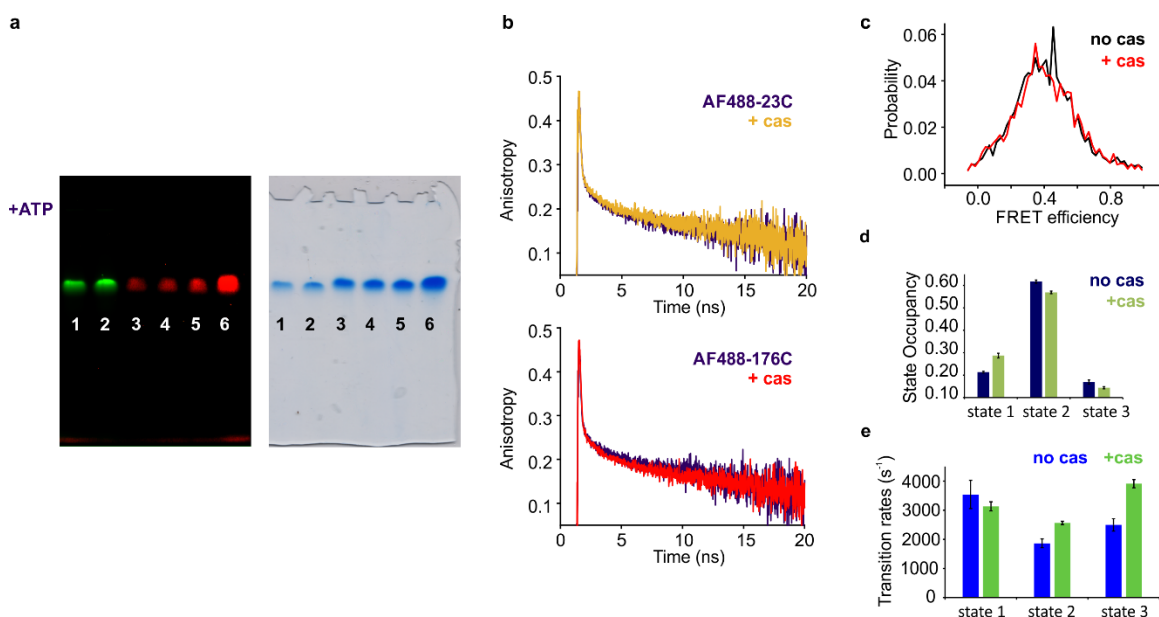

**Figure S1. Characterization of the 23C-176C mutant of ClpB, and measurements of the NTD dynamics.** (a) Representative native PAGE (6%) of fully fluorescently-labeled (with Alexa Fluor dyes (AF)) 23C-176C ClpB molecules in the presence of 2 mM ATP. Left- fluorescence image, right- white-light image after Coomassie staining. Top: Lanes 1-2- fully labeled AF488-23C-176C variant. Lanes 3-6- AF488 and AF594 double-labeled 23C-176C, mixed 1:100 with WT ClpB following a mixing by dialysis protocol detailed in the main text. Gel run for 12 h at 30 V and 4 °C. The gels display single bands in the presence of 2 mM ATP, indicating that ClpB mutants are homogeneously assembled. (b) Time-resolved fluorescence anisotropy decay curves of labeled (with AF488) single-cysteine 23C and 176C mutants, mixed 1:100 with WT ClpB, and measured in the presence of 2 mM ATP, without and with 25 μM κ-casein (“+ cas”). The steady-state fluorescence anisotropy values, calculated as detailed in the Supplementary Methods section, were  $0.205 \pm 0.001$  (n=3) for AF488-23C,  $0.201 \pm 0.001$  (n=3) for AF488-23C with κ-casein,  $0.208 \pm 0.001$  (n=3) for AF488-176C and  $0.206 \pm 0.001$  (n=3) for AF488-176C with κ-casein. The errors correspond to standard errors of the mean. The initial fast decay of the anisotropy in all curves indicates free rotation of AF488 dyes attached to the residues 23C and 176C. The longer time anisotropy decay is due to the rotation of the protein as a whole. The similarity of the decays and the steady-state values with and without substrate protein indicates no influence of the latter on the freedom of motion of the dyes. (c) FRET efficiency histograms of NBD1-NBD2 (176C-739C) ClpB with 2 mM ATP, labeled and assembled similarly to 23C-176C mutant (Fig. 2b, main text) are the same in the absence (black) and in the presence of 25 μM κ-casein (red). (d) The population of states 1-3 of the NTD of ClpB (23C-176C) from smFRET data with 2 mM ATP, with or without 25 μM κ-casein (n=4, sem), as derived from the H<sup>2</sup>MM analysis. (e) H<sup>2</sup>MM-derived transition rates for states 1-3 (n=4, sem), for the same samples as in (d).

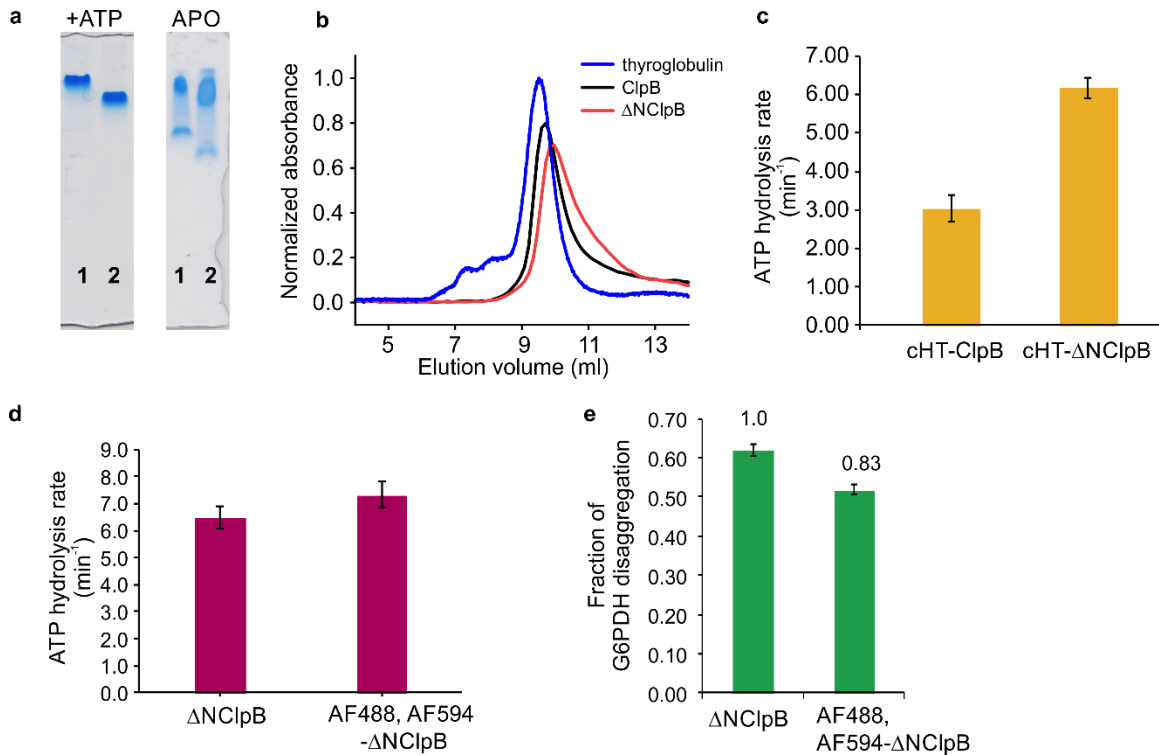

**Figure S2: Bulk experiments to test ATP activity and assembly of ClpB variants.** (a) Representative native gel (6%) of ClpB and  $\Delta$ NClpB in the presence of 2 mM ATP (left) or in the absence of nucleotides (“APO”, right). Lane 1- full-length ClpB, lane 2-  $\Delta$ NClpB on both gels. ClpB mutants migrate as single peaks only in the presence of ATP, supporting their full assembly. (b) Elution profiles of thyroglobulin protein (MW=669 kDa), full-length ClpB hexamers (578 kDa) and of  $\Delta$ NClpB hexamers (MW=486 kDa) in the presence of 2 mM ATP (25 mM HEPES, 25 mM KCl, 10 mM MgCl<sub>2</sub>, pH 8.0) using Superdex 200 Increase 10/300 GL column (GE Healthcare). Normalized absorbance value at 290 nm is shown. The profile maxima are close, at 9.5, 9.7 and 9.9 ml, respectively, further supporting correct assembly of ClpB. (c) ATP activity measurement at 25°C in the presence of 2 mM ATP using ClpB and  $\Delta$ NClpB proteins with cleaved six-histidine tag (“cHT”). The measured values were  $3.1 \pm 0.5$  (n=2) for ClpB and  $6.2 \pm 0.4$  (n=2) for  $\Delta$ NClpB, in good agreement with the results for the proteins with an uncleaved six-histidine tag. (Fig. 3, main text). (d) Comparison of basal ATP activity at 25°C of unmodified unlabeled  $\Delta$ NClpB and fully double-labeled mutant (with AF488 and AF594)  $\Delta$ NClpB (288C-631C). (e) Disaggregation of heat-induced aggregates of G6PDH, measured after 3 h of incubation in the presence of 2  $\mu$ M  $\Delta$ NClpB (either unmodified or fully double-labeled) with the addition of DnaK, DnaJ and GrpE (2  $\mu$ M, 1  $\mu$ M and 1  $\mu$ M, respectively). The error bars correspond to standard errors of the mean.



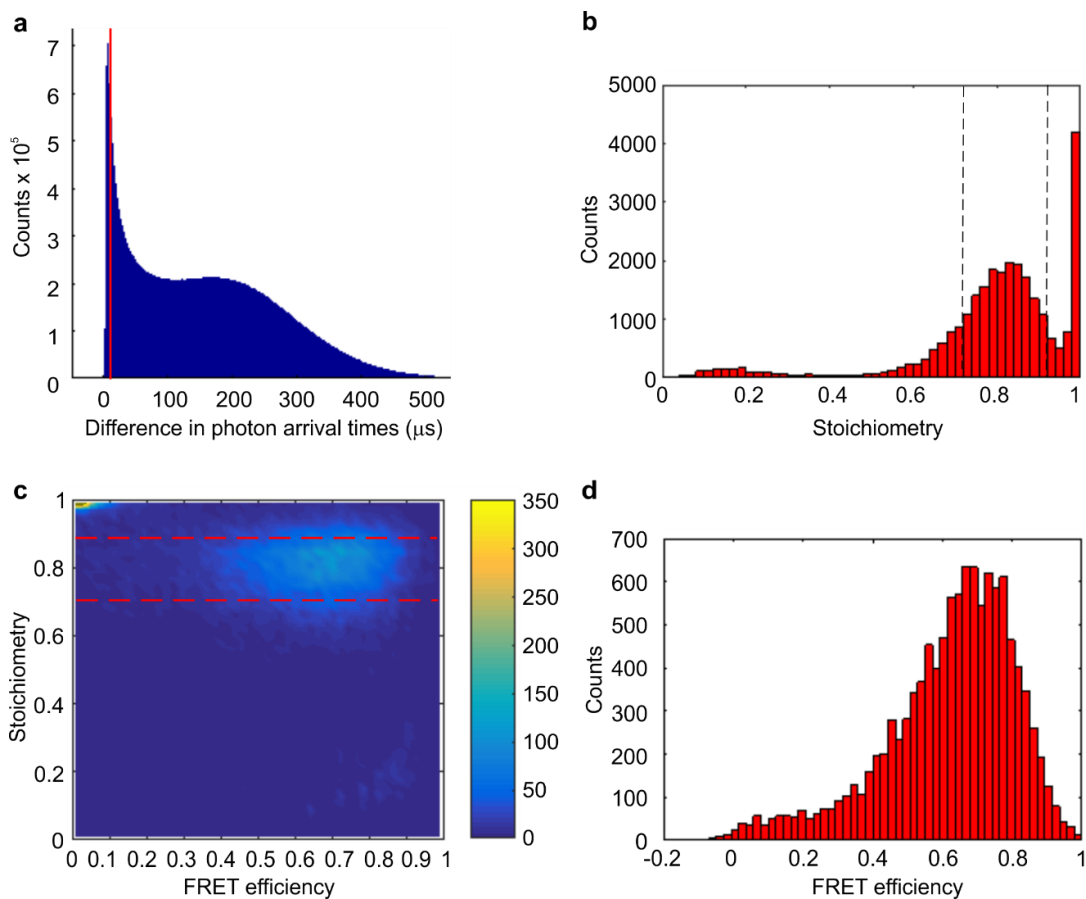

**Figure S4. Representative single-molecule results and data correction steps.** (a) Histogram of the time lags, recorded for the  $\Delta\text{NClpB}$  (S288C-S631C) sample in the presence of 2 mM ATP. A cut-off time of 10  $\mu\text{s}$  was used (red vertical line) to fully separate the photons emitted by the molecules from the background photons. (b) Representative stoichiometry histogram (50 bins), after correction for the leakage of photons from donor to acceptor channel. Stoichiometry, as described previously<sup>2-3</sup>, is computed as the ratio of the photons after donor (AF488) excitation to all photons after both donor and acceptor excitations, per fluorescence burst. Molecules bearing both the donor and acceptor dyes (AF488 and AF594, respectively) appear within the peak centered at the stoichiometry value of 0.83. Only molecules with the stoichiometry values between 0.73 and 0.91 are selected for further analysis to effectively eliminate any singly-labeled species. (c) Representative contour plot of stoichiometry versus FRET efficiency histogram (with 50 bins each). FRET efficiency is computed for each molecule after donor excitation only (as acceptor emission/(acceptor+donor emission)<sup>3</sup>). The dotted lines show the boundaries of selected stoichiometry values (0.73 and 0.91). FRET efficiency values of the molecules that have the stoichiometry values within this chosen range are selected. Then, only bursts with intensity greater than 30 photons are selected for further analysis. (d) The resulting FRET efficiency histogram (50 bins) for  $\Delta\text{NClpB}$  (with 2 mM ATP) with 11,309 selected molecules. Subsequent H<sup>2</sup>MM analysis, described in full detail previously<sup>4</sup>, feeds in the information of individual photons emitted by the selected molecules (color and arrival times), and we use first 5,800 selected molecules from each dataset to ensure that the same number enters the analysis of the data recorded under various experimental conditions.

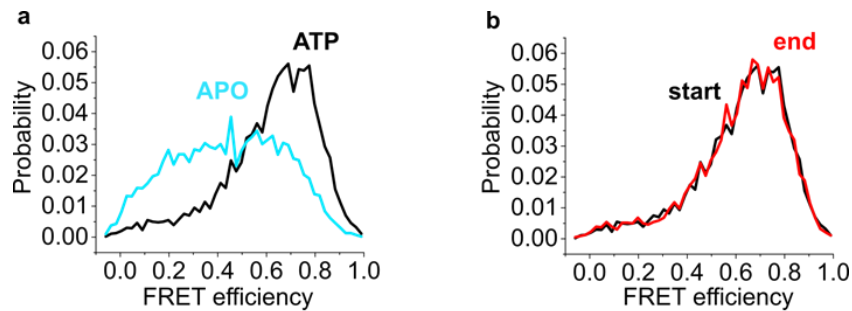

**Figure S5. FRET efficiency histograms from smFRET measurements of the MD dynamics of  $\Delta$ NCIpb.** (a) In the absence of ATP (blue), the FRET efficiency histogram is much broader than in its presence (black). This might be due to the partial disassembly of hexameric complexes in the absence of ATP, and therefore we carry out all smFRET experiments in the presence of 2 mM ATP. (b) FRET efficiency histograms derived from the measurement in the presence of 2 mM ATP. The acquired data are split in half, and FRET efficiency histograms for the first 100 min of detection (“start” in black) and the subsequent 100 min of detection (“end” in red) are compared. There is no change in their appearance, indicating that the analyzed species do not undergo changes during the measurement. All histograms contain 50 bins and are normalized to the total number of events.

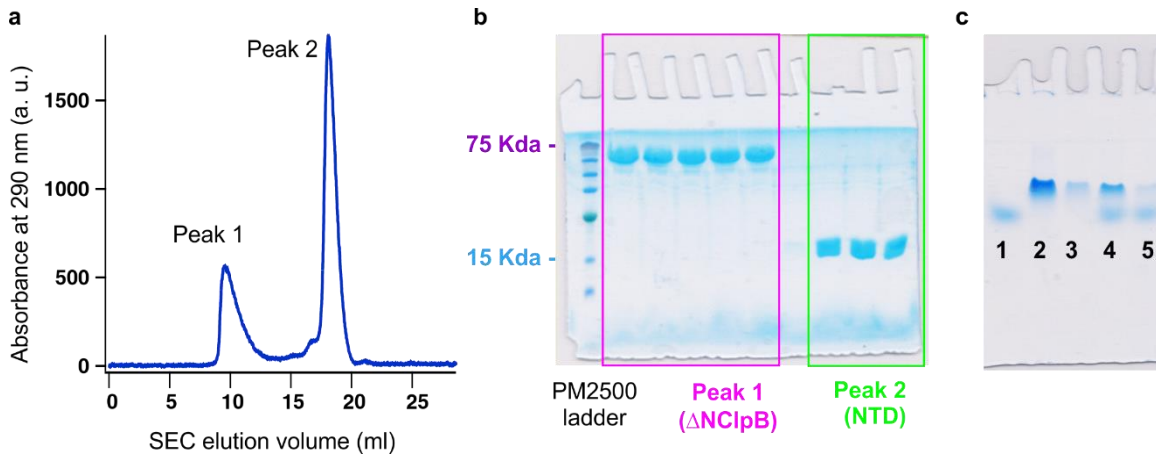

**Figure S6. Testing for the co-assembly of an isolated NTD of ClpB with  $\Delta$ NClpB.** (a) Elution profile of a sample containing  $\Delta$ NClpB (40  $\mu$ M) and NTD (650  $\mu$ M) (2 mM ATP, Superdex-200 column, GE Healthcare). Two high-intensity peaks are marked. (b) SDS-PAGE (15%) analysis of the two elution peaks. Peak 1 corresponds to  $\Delta$ NClpB, and peak 2 is the NTD. Neither peak contains the second component, indicating that  $\Delta$ NClpB and NTD elute separately. (c) Native PAGE of the NTD and  $\Delta$ NClpB (6%, 2 mM ATP) shows that the two components migrate separately. The lanes are as follows: 1- NTD, 2-  $\Delta$ NClpB; 3-  $\Delta$ NClpB with cleaved six-histidine tag; 4- NTD+ $\Delta$ NClpB; 5- NTD+ $\Delta$ NClpB with cleaved six-histidine tag.

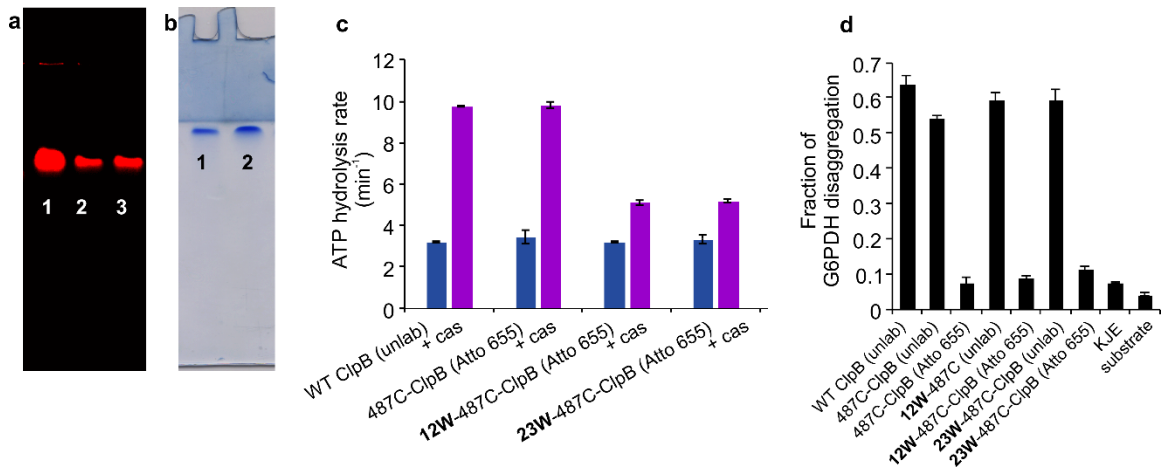

**Figure S7. Characterization of the mutants in the  $\alpha$ -helix A1 of ClpB and of Atto 655-labeled mutants.** (a) Representative fluorescence image of the native PAGE (6%) of fully-labeled Atto 655-ClpB mutants in the presence of ATP (2 mM). Lane 1- Atto 655-ClpB; lane 2- 12W-Atto 655-ClpB, lane 3- 23W-Atto 655-ClpB. (b) Representative native gel (6%) confirming full assembly of  $\Delta$ HA1 variant of ClpB ( $\Delta$ 8-25 aas) in the presence of 2 mM ATP. Lane 1-  $\Delta$ HA1ClpB, lane 2- unmodified full-length ClpB. (c) ATPase activity of fully-labeled Atto 655-ClpB variants at 25°C, without and with 50  $\mu$ M  $\kappa$ -casein (n=2). (d) Disaggregation of the heat-induced aggregates of G6PDH as a substrate by 487C mutants of ClpB, either unlabeled (denoted as “unlab”) or fully-labeled with Atto 655 (denoted as “Atto 655”), measured after 3 h of incubation. ClpB mutants are at 2  $\mu$ M, with the addition of DnaK, DnaJ and GrpE (2  $\mu$ M, 1  $\mu$ M and 1  $\mu$ M, respectively). The fraction of disaggregation was determined by taking the amount of native (non-aggregated) G6PDH as 1 (n=4). The error bars correspond to standard errors of the mean.



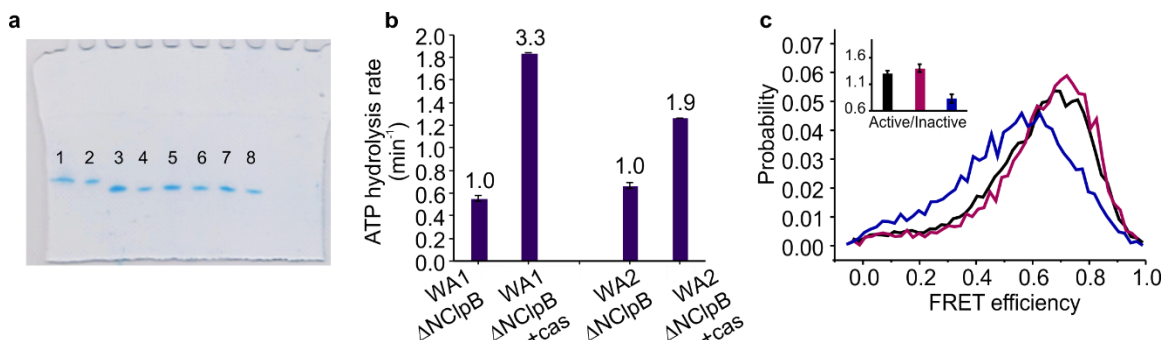

**Figure S8. Characterization of Walker A mutants of  $\Delta$ NClpB.** (a) Representative native PAGE (6%) of unmodified unlabeled full-length ClpB, unmodified  $\Delta$ NClpB, WA1- $\Delta$ NClpB (K64T, corresponding to K204T in the full-length ClpB) and WA2- $\Delta$ NClpB (K461T, corresponding to K601T in the full-length ClpB) variants in the presence of 2 mM ATP. Lanes 1, 2- ClpB (full-length), lanes 3, 4-  $\Delta$ NClpB, lanes 5, 6- WA1- $\Delta$ NClpB, lanes 7, 8- WA2- $\Delta$ NClpB. All ClpB variants migrate as single bands, indicating correct assembly. (b) Rate of ATP hydrolysis of WA1- $\Delta$ NClpB and WA2- $\Delta$ NClpB mutants with and without the addition of 50  $\mu$ M  $\kappa$ -casein at 25°C (n=2). (c) FRET efficiency histograms of Walker A mutants of  $\Delta$ NClpB (S288C-S631C). Black- $\Delta$ NClpB, purple- WA1-ClpB, blue- WA2-ClpB. Active/inactive state ratios of the MD are shown in the inset. A prominent shift to lower FRET efficiency values for WA2- $\Delta$ NClpB indicates a higher proportion of the inactive state upon ATP binding to NBD1. Indeed, H<sup>2</sup>MM analysis confirmed this (Table S2, S3), showing that the MD in WA2- $\Delta$ NClpB mutant was repressed, with the corresponding ratio of active/inactive states of  $0.83 \pm 0.08$ . Conversely, the MD in the WA1- $\Delta$ NClpB mutant was activated, with the active/inactive state ratio of  $1.4 \pm 0.08$ , similarly to the value obtained for  $\Delta$ NClpB. Thus, the suppression of the MD upon ATP binding to NBD1, seen in the full-length ClpB in our previous study<sup>3</sup>, is unaffected by the NTD deletion. The error bars correspond to standard errors of the mean.

**Table S1: Comparison of the photophysical properties of fluorescence bursts, collected in the single-molecule experiments of 23C-176C construct of ClpB with or without  $\kappa$ -casein. Selected bursts had photon arrival times below 10  $\mu$ s and more than 30 photons per burst.**

| Parameter                              | No $\kappa$ -casein | SD (n=3) | 25 $\mu$ M $\kappa$ -casein | SD (n=3) |
|----------------------------------------|---------------------|----------|-----------------------------|----------|
| mean photons per burst                 | 60.6                | 1.1      | 62.0                        | 1.0      |
| mean burst length (ms)                 | 0.40                | 0.02     | 0.41                        | 0.01     |
| rate of photons per burst (photons/ms) | 193                 | 2        | 188                         | 3        |

**Table S2: Analysis of ClpB's NTD dynamics. Comparison of the transition rates out of 3 states, derived from H<sup>2</sup>MM analysis, and the escape rates based on dwell-time distribution analysis<sup>3</sup>.**

| Sample   | H <sup>2</sup> MM analysis |           |           | Dwell time analysis |           |           |
|----------|----------------------------|-----------|-----------|---------------------|-----------|-----------|
|          | State                      | Rate (Hz) | SEM (n=4) | State               | Rate (Hz) | SEM (n=3) |
| 23C-176C | 1                          | 3540      | 480       | 1                   | 3650      | 590       |
|          | 2                          | 1860      | 150       | 2                   | 1570      | 360       |
|          | 3                          | 2500      | 220       | 3                   | 2450      | 70        |

| Sample                                      | H <sup>2</sup> MM analysis |           |           | Dwell time analysis |           |           |
|---------------------------------------------|----------------------------|-----------|-----------|---------------------|-----------|-----------|
|                                             | State                      | Rate (Hz) | SEM (n=4) | State               | Rate (Hz) | SEM (n=3) |
| 23C-176C plus $\kappa$ -casein (25 $\mu$ M) | 1                          | 3130      | 160       | 1                   | 3190      | 120       |
|                                             | 2                          | 2570      | 60        | 2                   | 2480      | 60        |
|                                             | 3                          | 3910      | 140       | 3                   | 3970      | 210       |

**Table S3: Distances between the residues (Ca-Ca) chosen for fluorescence labeling in the NTD and MD constructs, as measured in the static structures of ClpB, and the calculation of theoretical FRET efficiency values.**

| Structure PDB: 1QVR <sup>1</sup><br>TT ClpB monomer | NTD mutant<br>R23-D176 (Å) | Average<br>FRET<br>efficiency |
|-----------------------------------------------------|----------------------------|-------------------------------|
| Protomer A                                          | 33.6                       | 0.7                           |
| Protomer B                                          | 33.5                       |                               |
| Protomer C                                          | 39.8                       |                               |

| Structure PDB: 5OG1 <sup>5</sup><br>E. Coli ClpB BAP double Walker B ATP <sub>γ</sub> S | NTD mutant<br>G23-D184 (Å) | Average<br>FRET<br>efficiency |
|-----------------------------------------------------------------------------------------|----------------------------|-------------------------------|
| Protomer A                                                                              | 52.5                       | 0.25                          |

**Table S4: Comparison of the relative occupancies of active (tilted) to inactive (horizontal) states of the MD.** Results of the H<sup>2</sup>MM analysis of  $\Delta$ NC1pB data, with 5,800 molecules per sample and 2-4 repeats per condition (SD is the standard deviation). The population ratio between active and inactive state is reported with the respective standard error of the mean (SEM).

| Sample                                            | Inactive State | Inactive SD | Active State | Active SD | Active/Inactive | SEM  |
|---------------------------------------------------|----------------|-------------|--------------|-----------|-----------------|------|
| $\Delta$ NC1pB                                    | 0.44           | 0.02        | 0.56         | 0.02      | <b>1.30</b>     | 0.05 |
| $\Delta$ NC1pB plus $\kappa$ -casein (25 $\mu$ M) | 0.36           | 0.001       | 0.64         | 0.002     | <b>1.76</b>     | 0.01 |
| Hyper- $\Delta$ NC1pB                             | 0.35           | 0.01        | 0.65         | 0.01      | <b>1.85</b>     | 0.07 |
| Repr- $\Delta$ NC1pB                              | 0.57           | 0.04        | 0.43         | 0.04      | <b>0.76</b>     | 0.07 |
| WA1- $\Delta$ NC1pB                               | 0.42           | 0.02        | 0.58         | 0.02      | <b>1.40</b>     | 0.08 |
| WA2- $\Delta$ NC1pB                               | 0.45           | 0.02        | 0.55         | 0.02      | <b>0.83</b>     | 0.08 |
| $\Delta$ HA1ClpB                                  | 0.43           | 0.01        | 0.57         | 0.01      | <b>1.32</b>     | 0.06 |
| Full-length ClpB <sup>3</sup>                     | 0.49           | 0.01        | 0.51         | 0.01      | <b>1.00</b>     | 0.01 |

**Table S5: Comparison of the transition rates between inactive and active states of the MD, derived from H<sup>2</sup>MM analysis.**

| Sample                                            | Active to Inactive, $k_{12}$ (Hz) | SEM | Inactive to Active, $k_{21}$ (Hz) | SEM |
|---------------------------------------------------|-----------------------------------|-----|-----------------------------------|-----|
| $\Delta$ NC1pB                                    | 4780                              | 217 | 6296                              | 92  |
| $\Delta$ NC1pB plus $\kappa$ -casein (25 $\mu$ M) | 5278                              | 322 | 9573                              | 517 |
| Hyper- $\Delta$ NC1pB                             | 4123                              | 375 | 7840                              | 382 |
| Repr- $\Delta$ NC1pB                              | 5476                              | 146 | 4154                              | 269 |
| WA1- $\Delta$ NC1pB                               | 4551                              | 193 | 6527                              | 134 |
| WA2- $\Delta$ NC1pB                               | 3927                              | 249 | 3259                              | 423 |
| $\Delta$ HA1ClpB                                  | 4397                              | 111 | 5917                              | 310 |
| Full-length ClpB <sup>3</sup>                     | 5300                              | 150 | 5700                              | 100 |

**Table S6: Results of the steady-state fluorescence measurements of Atto 655-labeled ClpB mutants.**

| <b>Sample</b>          | <b>Fluorescence Intensity (a. u.)</b> | <b>SD (n=2)</b>    |
|------------------------|---------------------------------------|--------------------|
| Atto 655-487C ClpB     | $8.08 \times 10^7$                    | $2.92 \times 10^5$ |
| 12W Atto 655-487C ClpB | $2.93 \times 10^7$                    | $2.12 \times 10^2$ |
| 23W Atto 655-487C ClpB | $3.15 \times 10^7$                    | $8.06 \times 10^3$ |

**Table S7: Results of the fluorescence lifetime measurements of Atto 655-labeled ClpB mutants.**

| <b>Sample</b>          | <b>Lifetime (ns)</b> | <b>SD (n=4)</b>       |
|------------------------|----------------------|-----------------------|
| Atto 655-487C ClpB     | 2.04                 | $4.07 \times 10^{-3}$ |
| 12W Atto 655-487C ClpB | 1.29                 | $1.93 \times 10^{-3}$ |
| 23W Atto 655-487C ClpB | 1.32                 | $9.00 \times 10^{-3}$ |

## Supplementary Methods

**Protein expression and purification** was performed closely following the recently reported protocols<sup>3</sup>. *Thermus thermophilus* ClpB (*TT* ClpB) or  $\Delta$ NCIpB (*TT*  $\Delta$ NCIpB) DNA was cloned into a pET28b vector with kanamycin resistance, and a six-histidine tag was added at the start of the sequence, preceded by a tobacco etch virus protease (TEV) cleavage site. All mutations in  $\Delta$ NCIpB were introduced using standard site-directed mutagenesis and confirmed by DNA sequencing. *E. coli* BL21 (DE3) cells were transformed with the ClpB vector and grown at 37°C with shaking to OD 0.7-0.8 in the presence of kanamycin (Caisson Laboratories). Protein expression was induced by adding 1 mM IPTG, followed by an overnight incubation with shaking at 25°C. Subsequently, bacteria were harvested and the protein was purified on a Ni-NTA resin (GE Healthcare) and eluted with 250 mM imidazole (Sigma Aldrich). This was followed by an overnight dialysis at 4°C in the presence of 2 mM ATP (25 mM HEPES, 25 mM KCl, 2 mM TCEP, 10 mM MgCl<sub>2</sub>, 2 mM ATP) to remove imidazole from the solution. Following filtration (0.22  $\mu$ m Millex, Merck), the protein was further purified using a HiPrep DEAE FF column (GE Healthcare) equilibrated with 50 mM HEPES, 20 mM KCl and 2 mM TCEP at pH 7.4. The peak containing the purified protein was collected, aliquoted, flash-frozen and stored at -80°C. The purity was verified by gel electrophoresis. The aliquots were thawed immediately prior to experiments and used once. Expression and purification of any ClpB mutational variants, DnaK, DnaJ and GrpE followed similar procedures. Histidine-tag removal was carried out by adding ~6 mg histidine-tagged TEV protease to 20 mg protein during an overnight dialysis step after the first Ni-NTA column. The cleaved protein was then separated from the protease and from any uncleaved protein on a Ni-NTA column, and the subsequent purification steps were performed as described.

**Flow chamber preparation for single-molecule FRET experiments** was carried out by the assembly of two cover slip glasses of 24 x 50 mm and 18 x 18 mm (Paul Marienfeld, GmbH). Both cover slips were rinsed with 10% hydrogen fluoride solution for 40 seconds and then washed with pure water. Dried cover slips separated by Teflon strips were glued together by 10-15 min incubation in a dry oven at 115 °C. Ready-to-use flow cells were washed three times with the smFRET buffer (25 mM HEPES (pH 7.8), 10 mM MgCl<sub>2</sub>, 25 mM KCl and 0.01% TWEEN). To avoid protein sticking to the surface, the flow cell surface was coated with a supported lipid bilayer, by flowing in a solution containing liposomes prepared from egg phosphatidylcholine (Avanti Lipids) by extrusion through disposable 0.1 mm Anopore syringe filters (Whatman Anotop-10). The lipid solution was incubated within the cells for 2 min, and then the cells were washed three times with the smFRET buffer. The solutions of ClpB were loaded, and the flow chambers were sealed with silicon grease (1077460100, Merck) to prevent dehydration.

**Single-molecule microscopy setup** was custom-built. Dual mode laser diode heads 485 nm and 594 nm (LDH-D-C-485 and LDH-D-TA-595, respectively) were coupled to a polarization-maintaining single mode fiber (P3-488PM-FC-2 from Thorlabs, and SMF-C-FC 02126 from PicoQuant), using a laser beam coupler (60SMS-1-4-A11-01, Schäfter + Kirchhoff GmbH) and then collimated using aspherical lens (A220TM-A from Thorlabs). The laser beams were passed through a laser-line cleanup filter (FF02-482/18 from Semrock, and zet594/10x from Chroma), and combined using a dichroic mirror (zt488rdc-UF1 from Chroma). Laser beams were then expanded ~3.3 times using the two lenses (AC254-030-A and AC254-100-A from Thorlabs) in order to fill the back aperture of a 100x oil-immersion objective (OBJ, Zeiss FLUAR 100x/1.3NA). Laser intensities were controlled using a half-wave plate ( $\lambda/2$ : AHWP05M-600 from Thorlabs) and a polarized beam splitter (PBSW-20-4/10 from OptoSigma). To bring the lasers from a linearly polarized mode to a circularly polarized mode, a quarter-wave plate (WPM 25-4P from OptoSigma) was introduced in the end of the excitation path. The laser beams were then guided to the objective using a dichroic mirror (zt488/594rpc-PhaseR-UF1). A sample cell was mounted on a custom-designed sample holder, excited by the focused laser beam and the fluorescent emission from the sample was filtered using a Dual-band pass filter (zet488/594m), and passed through a positive achromatic lens (ACL0202). Then, the fluorescent emission was split into two detection channels by a second dichroic mirror (FF580-FDi01-25x3 from Semrock). The donor dye emission and the acceptor dye emission were filtered using emission filters (ET535/70 and ET645/75 from Chroma) and focused onto two single-photon avalanche photo-diodes (APD, Perkin-Elmer SPCM-AQR-15) using achromatic lenses (ACL0202) in front of the APDs. Each APD delivered a TTL pulse output

for each incoming photon. The arrival times of each of these photons were recorded by a standalone TCSPC module (HydraHarp 400, PicoQuant), which is synced with a multichannel Picosecond Diode Laser Driver (PDL 828 Sepia II from PicoQuant). The PDL module can generate a continuous wave (CW) or a pulsed laser output, and pulsed excitation mode was used for the single-molecule measurements.

**Average FRET efficiency calculation** was carried out for the NTD ClpB construct (23C-176C), as previously described<sup>3</sup>, based on a method of Michaelis and co-workers<sup>6-7</sup>. Two available structures were used, the crystal structure of TT ClpB monomer<sup>1</sup> and the cryo-EM structure of E. Coli ClpB (BAP double Walker B mutant with ATP $\gamma$ S, substrate-unbound) hexamer<sup>5</sup>. The two structures display the NTD in two distinctly different conformations, with the NTD in the cryo-EM structure noticeably tilted compared to that in the crystal structure. The accessible volume of AF dyes attached at residues 23 and 176 of ClpB was modeled in each structure, by taking the dye-linker dimensions into account as previously reported<sup>8</sup>. Average FRET efficiency value was then calculated based on all of the resulting dye locations, using the experimentally measured  $R_0$  (Alexa Fluor 488-594 = 54 Å)<sup>3</sup>. The results are summarized in Table S3. Values of 0.25 (from the cryo-EM structure) and 0.7 (from the crystal structure) for the NTD represent FRET efficiency values of 2 states of the NTD, and are in agreement with the measured values for states 1 and 3 (0.18 and 0.81, respectively) from H<sup>2</sup>MM.

**Fluorescence anisotropy decay measurements** were carried out using single-cysteine mutants of ClpB, 23C and 176C, labeled with AF488 and mixed with 100-fold molar excess of unmodified WT ClpB using the mixing by dialysis procedure described in the Methods section (main text). The samples were diluted to 1 nM (in 25 mM HEPES, 25 mM KCl, 10 mM MgCl<sub>2</sub>, 2 mM ATP, 0.01% TWEEN 20), with and without 25 μM κ-casein, filtered (0.1 μm filters, Whatman Anotop-10) and loaded into the flow chambers prepared according to the same protocol as for single-molecule measurements (main text). Data were collected using a MicroTime200 fluorescence microscope (PicoQuant), with 485 nm laser excitation (10 μW), 20 MHz repetition rate and 16 ps time resolution. Fluorescence was passed through a 50 μm pinhole, split into parallel and perpendicular components using a polarizing beam splitter (Ealing), filtered through band-pass filters (520/35 nm, Semrock) and collected by two single-photon avalanche photo-diode detectors (Excelitas SPCM-AQR-14-TR) coupled to a time-correlated single-photon counting module

(HydraHarp 400, PicoQuant). Time-resolved fluorescence anisotropy decays were then calculated as follows:

$$r(t) = \frac{I_{\parallel}(t) - I_{\perp}(t)}{I_{\parallel}(t) + 2I_{\perp}(t)}$$

where  $I_{\parallel}(t)$  and  $I_{\perp}(t)$  are the time-dependent fluorescence intensities of parallel and perpendicular components, respectively. Steady state fluorescence anisotropy was calculated using the integrated signal according to:

$$r = \frac{\sum I_{\parallel}(t) - G \sum I_{\perp}(t)}{\sum I_{\parallel}(t) + 2G \sum I_{\perp}(t)}$$

where G is the polarization sensitivity factor (whose value was 1 in our setup). The results are shown in Fig. S1.

**Disaggregation of heat-induced aggregates of G6PDH.** For the preparation of glucose-6-phosphate dehydrogenase (G6PDH) aggregates, 90  $\mu\text{M}$  G6PDH from *Leuconostoc mesenteroides* (Sigma Aldrich) was denatured for 5 min at 47°C in the presence of 5 M urea, 20 mM DTT and 7.5% glycerol. Then it was diluted 1:100 into a reactivation buffer (50 mM HEPES, 20 mM  $\text{MgCl}_2$ , 30 mM KCl, 1 mM EDTA, 1 mM TCEP, 3 mM ATP and 20  $\mu\text{g}/\mu\text{l}$  pyruvate kinase) and further incubated at 47°C for 15 min. For the disaggregation assay, 750 nM of the aggregated G6PDH was combined with 2  $\mu\text{M}$  ClpB (or with 2  $\mu\text{M}$  ClpB variants), 2  $\mu\text{M}$  DnaK, 1  $\mu\text{M}$  DnaJ and 1  $\mu\text{M}$  GrpE in the reactivation buffer, and incubated at 37°C for up to 3 hours. The activity of soluble G6PDH was measured both before and after the incubation with ClpB mixture, by withdrawing aliquots and diluting them into activity buffer (5 mM  $\text{MgCl}_2$ , 2 mM D-glucose-6-phosphate and 1 mM  $\text{NADP}^+$ ). The activity was measured by monitoring the time-dependent linear increase in absorption at 340 nm due to NADPH formation. The steepest linear increase in absorption was observed for native non-heated G6PDH. The fraction of disaggregation was reported as the slope measured for the samples divided by the slope measured for native G6PDH. To obtain the concentration of the recovered G6PDH, the fraction of disaggregation was multiplied by the starting concentration (750 nM). To obtain the disaggregation rates, we measured the activity of soluble G6PDH in the disaggregation mixtures over time, and plotted the concentration of recovered G6PDH as a function of time during the incubation at 37°C. The disaggregation rate was calculated as a slope of the initial linear part of the curve (first 50 min).



## Supplementary References

1. Lee, S.; Sowa, M. E.; Watanabe, Y. H.; Sigler, P. B.; Chiu, W.; Yoshida, M.; Tsai, F. T., The structure of ClpB: a molecular chaperone that rescues proteins from an aggregated state. *Cell* **2003**, *115* (2), 229-40.
2. Kapanidis, A. N.; Lee, N. K.; Laurence, T. A.; Doose, S.; Margeat, E.; Weiss, S., Fluorescence-aided molecule sorting: analysis of structure and interactions by alternating-laser excitation of single molecules. *Proc Natl Acad Sci U S A* **2004**, *101* (24), 8936-41.
3. Mazal, H.; Iljina, M.; Barak, Y.; Elad, N.; Rosenzweig, R.; Goloubinoff, P.; Riven, I.; Haran, G., Tunable microsecond dynamics of an allosteric switch regulate the activity of a AAA+ disaggregation machine. *Nat Commun* **2019**, *10* (1), 1438.
4. Pirchi, M.; Tsukanov, R.; Khamis, R.; Tomov, T. E.; Berger, Y.; Khara, D. C.; Volkov, H.; Haran, G.; Nir, E., Photon-by-Photon Hidden Markov Model Analysis for Microsecond Single-Molecule FRET Kinetics. *J. Phys. Chem. B* **2016**, *120* (51), 13065-13075.
5. Deville, C.; Carroni, M.; Franke, K. B.; Topf, M.; Bukau, B.; Mogk, A.; Saibil, H. R., Structural pathway of regulated substrate transfer and threading through an Hsp100 disaggregase. *Sci Adv* **2017**, *3* (8), e1701726.
6. Muschielok, A.; Andrecka, J.; Jawhari, A.; Brückner, F.; Cramer, P.; Michaelis, J., A nano-positioning system for macromolecular structural analysis. *Nat Methods* **2008**, *5* (11), 965-71.
7. Muschielok, A.; Michaelis, J., Application of the nano-positioning system to the analysis of fluorescence resonance energy transfer networks. *J Phys Chem B* **2011**, *115* (41), 11927-37.
8. Kalinin, S.; Peulen, T.; Sindbert, S.; Rothwell, P. J.; Berger, S.; Restle, T.; Goody, R. S.; Gohlke, H.; Seidel, C. A., A toolkit and benchmark study for FRET-restrained high-precision structural modeling. *Nat Methods* **2012**, *9* (12), 1218-25.
